# Supplementary material for: Geostatistical modelling of the association between malaria and child growth in Africa
Source: PubMed Central journal article supplement (PMC5828493; doi:10.1186/s12942-018-0127-y), 2018-02-27
Supplement: 12942_2018_127_MOESM2_ESM.pdf [file 12942_2018_127_MOESM2_ESM.pdf]

## Additional file 2: Details of the World Bank development indicators

Additional Table 1. World Bank Development Indicators.

| Indicator                                   | Description                                                                                                                                                                                                                                                                                                                          |
|---------------------------------------------|--------------------------------------------------------------------------------------------------------------------------------------------------------------------------------------------------------------------------------------------------------------------------------------------------------------------------------------|
| Land under cereal production                | Land under cereal production refers to harvested area, although some countries report only sown or cultivated area. Cereals include wheat, rice, maize, barley, oats, rye, millet, sorghum, buckwheat, and mixed grains.                                                                                                             |
| Arable land                                 | Arable land includes land defined as land under temporary crops (double-cropped areas are counted once).                                                                                                                                                                                                                             |
| Livestock production index                  | Livestock production index includes meat and milk from all sources, dairy products such as cheese, and eggs, honey, raw silk, wool, and hides and skins.                                                                                                                                                                             |
| GDP per capita                              | GDP per capita based on purchasing power parity.                                                                                                                                                                                                                                                                                     |
| Primary completion rate, male               | Primary completion rate is the number of new entrants in the last grade of primary education, regardless of age, divided by the population at the entrance age for the last grade of primary education.                                                                                                                              |
| Population density                          | Population density is midyear population divided by land area in square kilometers.                                                                                                                                                                                                                                                  |
| Progression to secondary school, female     | Progression to secondary school refers to the number of new entrants to the first grade of secondary school in a given year as a percentage of the number of students enrolled in the final grade of primary school in the previous year (minus the number of repeaters from the last grade of primary education in the given year). |
| Prevalence of anemia among children         | Prevalence of anemia, children under age 5, is the percentage of children under age 5 whose hemoglobin level is less than 110 grams per liter at sea level.                                                                                                                                                                          |
| Improved water source                       | Access to an improved water source refers to the percentage of the population using an improved drinking water sources which include piped water on premises and other improved drinking water sources such as public taps or standpipes, tube wells or boreholes, protected dug wells, protected springs, and rainwater collection. |
| Improved sanitation facilities, rural/urban | Access to improved sanitation facilities refers to the percentage of the population using improved sanitation facilities. Improved sanitation facilities include flush/pour flush (to piped sewer system, septic tank, pit latrine), ventilated improved pit (VIP) latrine, pit latrine with slab, and composting toilet.            |
| Unemployment                                | Unemployment refers to the share of the labor force that is without work but available for and seeking employment.                                                                                                                                                                                                                   |

Additional Table 2. Regression table for the meta analysis

| World Bank Development Indicator        | Point Estimate            | Standard Error          | p-value |
|-----------------------------------------|---------------------------|-------------------------|---------|
| Land under cereal production            | $5.0388 \times 10^{-8}$   | $4.3233 \times 10^{-8}$ | 0.2590  |
| Arable land                             | $7.9548 \times 10^{-3}$ * | $2.8915 \times 10^{-3}$ | 0.0131  |
| Livestock production index              | $5.7663 \times 10^{-4}$   | $1.6313 \times 10^{-3}$ | 0.7278  |
| GDP per capita                          | $-4.1747 \times 10^{-5}$  | $3.5107 \times 10^{-5}$ | 0.2498  |
| Primary completion rate, male           | $-2.3216 \times 10^{-3}$  | $2.9019 \times 10^{-3}$ | 0.4341  |
| Population density                      | $5.5419 \times 10^{-4}$   | $4.8843 \times 10^{-4}$ | 0.2714  |
| Progression to secondary school, female | $-3.8597 \times 10^{-3}$  | $3.6859 \times 10^{-3}$ | 0.3089  |
| Prevalence of anaemia among children    | $-4.6101 \times 10^{-3}$  | $4.7033 \times 10^{-3}$ | 0.3400  |
| Improved water source                   | $-5.1427 \times 10^{-3}$  | $4.3177 \times 10^{-3}$ | 0.2491  |
| Improved sanitation facilities, urban   | $2.7747 \times 10^{-3}$   | $3.5442 \times 10^{-3}$ | 0.4439  |
| Unemployment                            | $5.0836 \times 10^{-3}$   | $8.4332 \times 10^{-3}$ | 0.5542  |

*Dependent Variable:* Estimate of malaria-HAZ association parameter

Significance levels: 0 '\*\*\*\*' 0.001 '\*\*' 0.01 '\*' 0.05 '.' 0.1 '.' 1
