# Supplementary material for: Geostatistical modelling of the association between malaria and child growth in Africa
Source: PubMed Central journal article supplement (PMC5828493; doi:10.1186/s12942-018-0127-y), 2018-02-27
Supplement: 12942_2018_127_MOESM3_ESM.pdf [file 12942_2018_127_MOESM3_ESM.pdf]

# Additional file 3: Estimates of covariance parameters

Additional Table 3. Estimates of Covariance Parameters

| Survey             | $\log(\sigma^2)$ | $\log(\phi)$  | $\log(\tau^2)$ | $\log(\omega^2)$ |
|--------------------|------------------|---------------|----------------|------------------|
| Senegal 2005       | -4.130 (0.981)   | 4.520 (0.983) | -2.055 (2.042) | 0.659 (1.963)    |
| Senegal 2011       | -2.915 (0.522)   | 4.311 (0.724) | -2.180 (1.171) | 0.951 (1.045)    |
| Mozambique 2011    | -1.802 (0.333)   | 5.001 (0.457) | -2.197 (0.754) | 0.959 (0.666)    |
| Ghana 2003         | -2.388 (0.493)   | 4.780 (0.705) | -2.565 (1.136) | 0.687 (0.987)    |
| Ghana 2008         | -2.995 (1.552)   | 3.056 (1.488) | -1.290 (3.355) | 0.930 (3.105)    |
| Ghana 2014         | -3.154 (0.494)   | 4.551 (0.786) | -3.601 (1.407) | 0.323 (0.988)    |
| Burkina Faso 2003  | -0.696 (0.530)   | 5.328 (0.693) | -2.289 (1.068) | 1.105 (1.059)    |
| Burkina Faso 2010  | -2.426 (0.394)   | 3.500 (0.503) | -1.981 (0.971) | 0.833 (0.789)    |
| Zambia 2007        | -1.886 (0.651)   | 6.025 (0.854) | -2.755 (1.377) | 1.115 (1.303)    |
| Zambia 2014        | -2.713 (0.487)   | 3.600 (1.124) | -1.830 (1.138) | 1.041 (0.975)    |
| Malawi 2004        | -2.905 (0.674)   | 4.975 (1.225) | -2.678 (1.441) | 1.117 (1.348)    |
| Malawi 2010        | -3.329 (0.682)   | 3.086 (0.634) | -2.443 (1.628) | 1.015 (1.365)    |
| Rwanda 2005        | -3.0599 (0.549)  | 3.019 (0.731) | -1.970 (1.221) | 0.812 (1.099)    |
| Cote d'Ivoire 2007 | -1.155 (0.678)   | 1.798 (0.869) | -2.186 (3.046) | 1.375 (1.357)    |
| Burundi 2010       | -2.909 (0.424)   | 2.122 (0.527) | -2.816 (1.175) | 0.502 (0.848)    |
| Liberia 2007       | -2.885 (0.745)   | 2.955 (0.648) | -2.665 (1.966) | 1.111 (1.491)    |
| Liberia 2013       | -3.324 (0.700)   | 3.563 (0.693) | -2.821 (1.741) | 0.874 (1.400)    |
| Namibia 2007       | -2.255 (0.431)   | 5.011 (0.522) | -3.714 (1.447) | 0.743 (0.862)    |
| Togo 2014          | -3.335 (1.454)   | 1.674 (0.714) | -3.847 (5.168) | 0.540 (2.908)    |
| Tanzania 2010      | -2.313 (0.304)   | 4.860 (0.489) | -3.175 (0.853) | 0.670 (0.607)    |

*Standard errors in brackets*
