# Supplementary material for: Geostatistical modelling of the association between malaria and child growth in Africa
Source: PubMed Central journal article supplement (PMC5828493; doi:10.1186/s12942-018-0127-y), 2018-02-27
Supplement: 12942_2018_127_MOESM6_ESM.pdf [file 12942_2018_127_MOESM6_ESM.pdf]

## Additional file 6: Accounting for the uncertainty in malaria incidence

To account for the uncertainty in malaria incidence, we consider two possible scenarios: (A) predictive samples or measures of uncertainty from the model used to estimate malaria incidence are available; (B) the data on malaria incidence are available. In what follows, we shall use  $\mathcal{M}_{ij}$  to denote the mean of the predictive distribution of malaria incidence during the first year of life of the  $j$ -th child at location  $x_i$ .

*Scenario (A).* Let  $\mathcal{M}_{ij}^{(r)}$ ;  $r = 1, 2, \dots, R$  be predictive samples of malaria incidence for the  $j$ -th child at location  $x_i$ . The resulting likelihood function is now obtained by averaging over the samples  $\mathcal{M}_{ij}^{(r)}$ , i.e.

$$\frac{1}{R} \sum_{r=1}^R [Y_{ij} | \mathcal{M}_{ij}^{(r)}] = \frac{1}{R} \sum_{r=1}^R \int \int [S(x_i)] [U_i] [Y_{ij} | S(x_i), U_i, \mathcal{M}_{ij}^{(r)}] dU_i dS(x_i), \quad (\text{AF6.1})$$

where  $[\cdot]$  is a shorthand notation for “the distribution of  $\cdot$ ” and  $[Y_{ij} | S(x_i), U_i, \mathcal{M}_{ij}^{(r)}]$  is a Gaussian distribution with mean as in equation (1) of the main manuscript and variance  $\omega^2$ . The expression for  $[Y_{ij} | \mathcal{M}_{ij}^{(r)}]$  is given in “Additional file 1”. The resulting estimate of  $\delta$  and its standard error based on (AF6.1) incorporate the uncertainty in  $\mathcal{M}_{ij}$ .

However, due to limited computer memory, the predictive samples  $\mathcal{M}_{ij}^{(r)}$  may not have been stored but summaries of the overall dispersion, such as standard errors, might instead be available. Let  $v_{ij}^2$  denote the variance of the predictive distribution for malaria incidence. By approximating this with a log-Gaussian distribution, we then generate samples  $\mathcal{M}_{ij}^{(r)}$  on the logarithmic scale by simulating from a Gaussian distribution with mean

$$\log \left\{ \frac{\mathcal{M}_{ij}}{\sqrt{1 + \frac{v_{ij}^2}{\mathcal{M}_{ij}}}} \right\}$$

and variance

$$\log \left\{ 1 + \frac{v_{ij}^2}{\mathcal{M}_{ij}^2} \right\}.$$

Finally, we can use the resulting samples  $\mathcal{M}_{ij}^{(r)}$  as in (AF6.1). However, the validity of this approach largely depends on the accuracy of the log-Gaussian approximation which is not feasible in cases where  $\mathcal{M}_{ij} = 0$ .

*Scenario (B).* In this scenario, the availability of data on malaria would allow us to develop a bivariate model for HAZ and the number of malaria episodes, denoted by  $W_{ij}$ , experienced by a child during his first year of life. This is preferred to *Scenario A* because we can then model the underlying process of malaria incidence within a geostatistical framework that is consistent with our approach used for HAZ. More specifically, we would assume that  $W_{ij}$ , conditionally on a spatial Gaussian process  $\tilde{S}(x_i)$ , are mutually independent Poisson variables, such that

$$\log \{ \mathcal{M}_{ij} \} = \tilde{e}_{ij}^\top \tilde{\gamma} + \tilde{d}(x_i)^\top \tilde{\beta} + \tilde{S}(x_i), \quad (\text{AF6.2})$$

where  $\tilde{e}_{ij}$  and  $\tilde{d}(x_i)$  are child-specific and spatially referenced explanatory variables with associated regression coefficients  $\tilde{\gamma}$  and  $\tilde{\beta}$ , respectively. The joint likelihood for  $Y_{ij}$  and  $W_{ij}$  is then given by

$$[Y_{ij}, W_{ij}] = \int \int \int [S(x_i)][U_i][\mathcal{M}_{ij}][Y_{ij}|S(x_i), U_i, \mathcal{M}_{ij}][W_{ij}|\mathcal{M}_{ij}] dU_i dS(x_i) d\mathcal{M}_{ij}. \quad (\text{AF6.3})$$

Monte Carlo methods could then be used to approximate the above integral which is not available in closed form; see, for example, [1].

## References

- [1] Christensen, O.F.: Monte carlo maximum likelihood in model-based geostatistics. *Journal of Computational and Graphical Statistics* **13**(3), 702–718 (2004)
